# Supplementary material
Source: PubMed Central journal article supplement (PMC2944643)

Fig S1. Endurance exercise capacity was estimated using a speed-ramped treadmill running test over five consecutive days. The greatest distance run in meters (m) out of the five trials was considered the best estimate of intrinsic genetic composition. HCR rats run demonstrated more than 5-fold greater capacity than LCR rats. ( $1,062.2 \pm 165.16$  m vs  $192.2 \pm 50.71$  m;  $P < 0.001$ ). Data shown is for 40 female rats (20 Low capacity runners; LCR and 20 High capacity runners; HCR). Trial 1 was significantly different than trials 2-5.  $*p < 0.05$  Repeated ANOVA with Newman-Keuls Multiple Comparison.

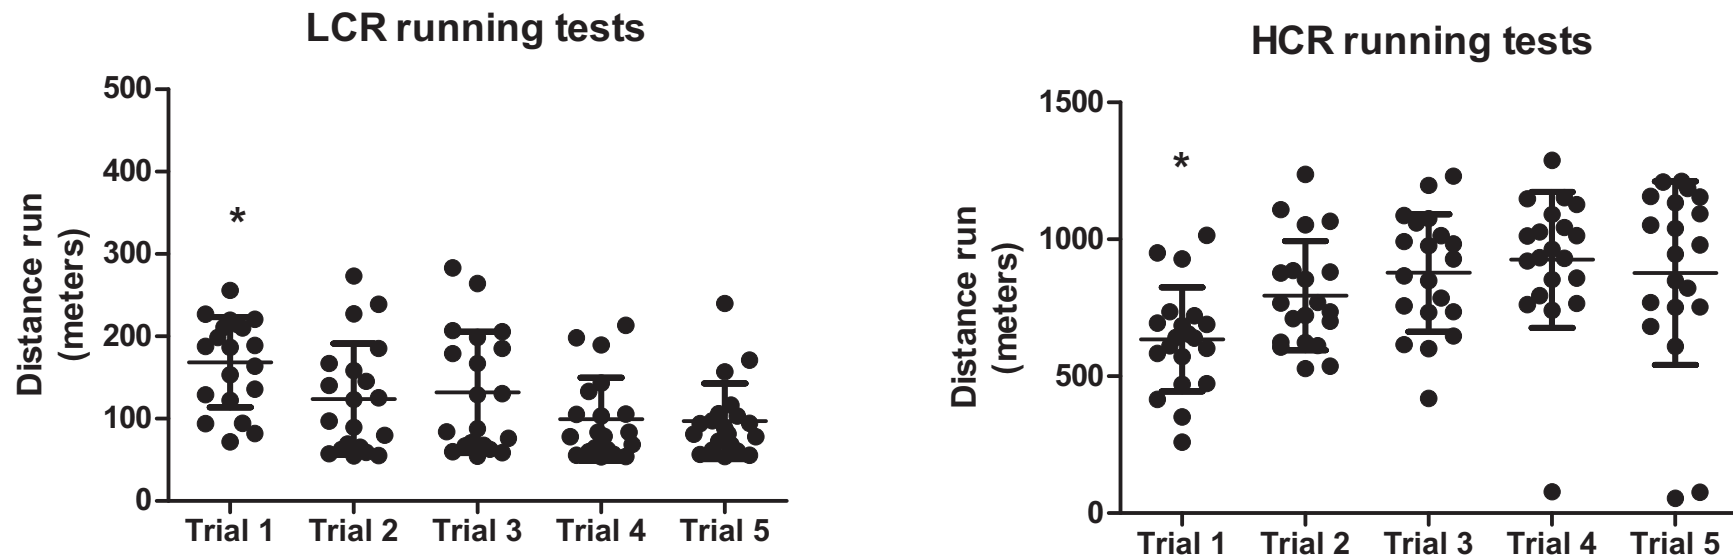

Supplement: supp_japplphysiol.01026.2009_figS1.pdf [file supp_japplphysiol.01026.2009_figS1.pdf]
