# Supplementary material
Source: PubMed Central journal article supplement (PMC2944643)
Supplement: supp_japplphysiol.01026.2009_figS2.pdf [file supp_japplphysiol.01026.2009_figS2.pdf]

Figure S2: The weighed mass of visceral adiposity showed the greatest amount of common variation with intrinsic running capacity in an **unselected** population of N:NIH rats. Linear regressions and 95% confidence intervals are shown for females and males.

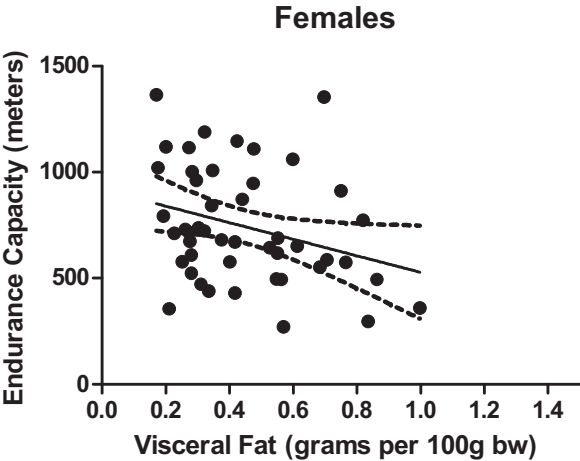

$$y = -390x + 918$$
$$r = -0.3; p = 0.04$$

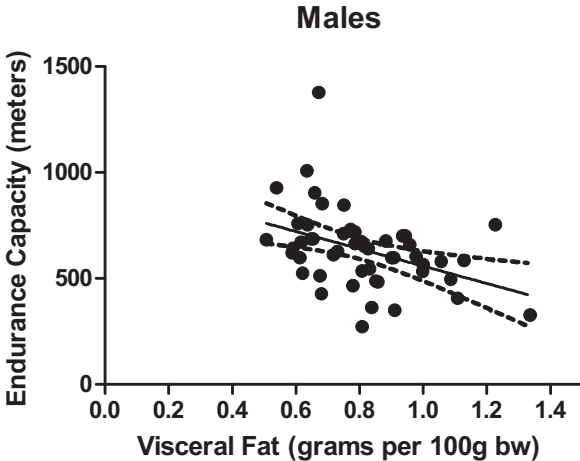

$$y = -409x + 968$$
$$r = -0.4; p = 0.004$$
