# Supplementary material
Source: PubMed Central journal article supplement (PMC2944643)
Supplement: supp_japplphysiol.01026.2009_tableS1.pdf [file supp_japplphysiol.01026.2009_tableS1.pdf]

**Table S1. A correlation study between the endurance running capacity and several key organ masses in an unselected population of heterogenous N:NIH rats. Values represent the range (minimum, median, and maximum), mean, and standard deviations for each trait.**

| <b>N:NIH Unselected females</b> | <b>n</b> | <b>Min</b> | <b>Med</b> | <b>Max</b> | <b>Mean</b> | <b>STD</b> | <b>r</b> | <b>p value</b> |
|---------------------------------|----------|------------|------------|------------|-------------|------------|----------|----------------|
| Endurance Capacity (m)          | 47       | 270        | 688.9      | 1364       | 743.7       | 273.00     |          |                |
| Body Mass. (g)                  | 47       | 162        | 210        | 240        | 208.7       | 19.21      | -0.21    | 0.15           |
| Visceral Fat (g/kg bw)          | 47       | 0.17       | 0.40       | 1.00       | 0.45        | 0.21       | -0.30    | <b>0.04</b>    |
| Heart Mass (g/kg bw)            | 47       | 0.29       | 0.36       | 0.42       | 0.36        | 0.03       | 0.22     | 0.13           |
| Liver Mass (g/ kg bw)           | 47       | 4.08       | 5.02       | 5.92       | 5.02        | 0.33       | 0.10     | 0.52           |
| Stomach (g/kg bw)               | 46       | 0.40       | 0.49       | 0.62       | 0.50        | 0.05       | -0.10    | 0.51           |
| Rt. Kidney Mass (g/kg bw)       | 45       | 0.39       | 0.47       | 0.60       | 0.47        | 0.04       | 0.25     | 0.10           |
| Lft. Kidney Mass (g/kg bw))     | 46       | 0.39       | 0.46       | 0.83       | 0.48        | 0.07       | 0.07     | 0.64           |
| Sm. Intest. Mass (g/kg/ bw)     | 47       | 1.99       | 2.42       | 2.90       | 2.45        | 0.20       | -0.16    | 0.28           |
| Gastroc. Mass (g/kg bw)         | 47       | 0.51       | 0.62       | 0.69       | 0.61        | 0.03       | -0.18    | 0.28           |
| Sm. Intest. Length (cm)         | 47       | 96.6       | 110.4      | 125.0      | 110.1       | 6.37       | -0.23    | 0.12           |
| <b>N:NIH Unselected males</b>   |          |            |            |            |             |            |          |                |
| Endurance Capacity (m)          | 50       | 273.3      | 634.3      | 1378       | 636.5       | 184.50     |          |                |
| Body Mass. (g)                  | 50       | 227        | 306.5      | 361        | 299.4       | 29.88      | -0.31    | <b>0.03</b>    |
| Visceral Fat (g/kg bw)          | 50       | 0.51       | 0.80       | 1.34       | 0.81        | 0.18       | -0.40    | <b>0.00</b>    |
| Heart Mass (g/kg bw)            | 49       | 0.28       | 0.33       | 0.41       | 0.33        | 0.03       | -0.11    | 0.43           |
| Liver Mass (g/ kg bw)           | 50       | 4.14       | 5.31       | 6.17       | 5.18        | 0.55       | -0.24    | 0.09           |
| Stomach (g/kg bw)               | 50       | 0.35       | 0.40       | 0.50       | 0.41        | 0.04       | 0.31     | <b>0.03</b>    |
| Rt. Kidney Mass (g/kg bw)       | 48       | 0.00       | 0.49       | 0.54       | 0.47        | 0.08       | 0.12     | 0.42           |
| Lft. Kidney Mass (g/kg bw))     | 50       | 0.42       | 0.48       | 0.85       | 0.49        | 0.07       | -0.25    | 0.08           |
| Sm. Intest. Mass (g/kg/ bw)     | 49       | 1.61       | 1.93       | 2.23       | 1.92        | 0.17       | 0.17     | 0.24           |
| Gastroc. Mass (g/kg bw)         | 50       | 0.51       | 0.59       | 0.69       | 0.60        | 0.04       | 0.21     | 0.14           |
| Sm. Intest. Length (cm)         | 49       | 100.6      | 117.6      | 155.4      | 119.0       | 8.86       | -0.26    | 0.07           |
